# Supplementary material for: Dynamic regulation of genome-wide pre-mRNA splicing and stress tolerance by the Sm-like protein LSm5 in Arabidopsis
Source: PubMed Central journal article supplement (PMC4053965; doi:10.1186/gb-2014-15-1-r1), 2014-01-07
Supplement: gb-2014-15-1-r1-S8.pdf [file gb-2014-15-1-r1-S8.pdf]

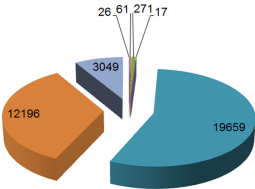

- Alternative Last Exon
- Alternative First Exon
- Coordinate Cassette Exons
- Mutually Exclusive Exon
- Alternative 3' Splice Site
- Alternative 5' Splice Site
- Casette Exon
