# Supplementary material for: Dynamic regulation of genome-wide pre-mRNA splicing and stress tolerance by the Sm-like protein LSm5 in Arabidopsis
Source: PubMed Central journal article supplement (PMC4053965; doi:10.1186/gb-2014-15-1-r1), 2014-01-07
Supplement: gb-2014-15-1-r1-S27.pdf [file gb-2014-15-1-r1-S27.pdf]

## *sad1* (Control)

corresponding gene-term association  
positively reported

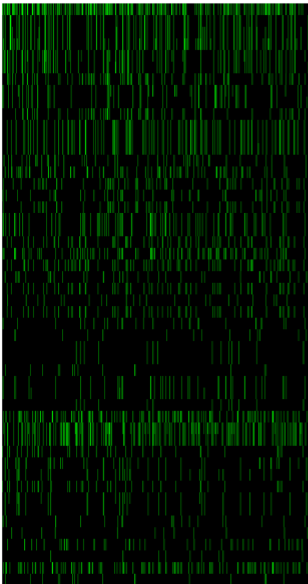

corresponding gene-term association  
not reported yet

response to abiotic stimulus  
response to cadmium ion  
response to metal ion  
response to inorganic substance  
response to osmotic stress  
response to salt stress  
response to temperature stimulus  
response to bacterium  
defense response to bacterium  
response to cold  
establishment of protein localization  
protein transport  
protein localization  
photosynthesis  
generation of precursor metabolites and energy  
ribonucleoprotein complex biogenesis  
sulfur metabolic process  
ribosome biogenesis  
carboxylic acid biosynthetic process  
organic acid biosynthetic process  
cellular macromolecule localization  
nitrogen compound biosynthetic process  
intracellular transport  
cellular carbohydrate catabolic process  
intracellular protein transport  
root morphogenesis  
cellular protein localization  
sulfur compound biosynthetic process  
starch metabolic process  
regulation of phosphate metabolic process  
regulation of phosphorus metabolic process  
photorespiration  
cellular amino acid biosynthetic process  
amine biosynthetic process  
regulation of phosphorylation  
post-embryonic development  
response to organic substance  
response to endogenous stimulus  
response to water deprivation  
carbohydrate catabolic process  
monosaccharide metabolic process  
response to water  
hexose metabolic process  
glucose metabolic process  
sulfur amino acid metabolic process  
photosynthesis, light harvesting  
growth  
pyruvate metabolic process  
reproductive structure development  
cellular metabolic compound salvage
