# Supplementary material for: Dynamic regulation of genome-wide pre-mRNA splicing and stress tolerance by the Sm-like protein LSm5 in Arabidopsis
Source: PubMed Central journal article supplement (PMC4053965; doi:10.1186/gb-2014-15-1-r1), 2014-01-07

**Total transcripts  
(NaCl)**

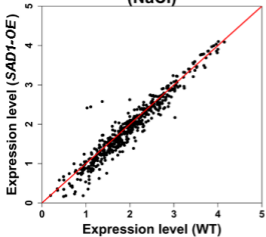

**Functional transcripts  
(NaCl)**

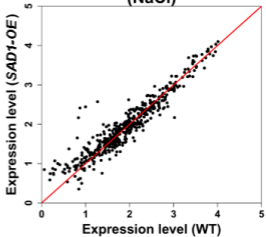

Supplement: gb-2014-15-1-r1-S35.pdf [file gb-2014-15-1-r1-S35.pdf]
