# Supplementary material for: Dynamic regulation of genome-wide pre-mRNA splicing and stress tolerance by the Sm-like protein LSm5 in Arabidopsis
Source: PubMed Central journal article supplement (PMC4053965; doi:10.1186/gb-2014-15-1-r1), 2014-01-07
Supplement: gb-2014-15-1-r1-S37.pdf [file gb-2014-15-1-r1-S37.pdf]

Gene annotated to corresponding pathway

## Biotic/Abiotic Stress

Abiotic stress

Recognition

R genes

Respiratory burst

Signaling

MAPK

Transcription factors

Defense genes

PR-proteins

Secondary metabolites

Redox state

Peroxidases

Glutathione-S-transferase

Signaling

MAPK

ERF

bZIP

WRKY

MYB

DOF

Transcription factors

Heat shock proteins

Secondary metabolites

Hormone signaling

- Auxins
- Brassinost.
- ABA
- Ethylene
- SA
- JA

Cell wall

- Beta glucanase
- Proteolysis

Misc. functions

HSPs

Putative involvement in biotic stress

Putative involvement in biotic stress
